# 1 Long-read whole genome sequencing identifies causal 2 structural variation in a Mendelian disease

3  
4 Jason D. Merker,<sup>1,2,8</sup> Aaron M. Wenger,<sup>3,8</sup> Tam Sneddon,<sup>2</sup> Megan Grove,<sup>2</sup> Daryl Waggott,<sup>4,5</sup> Sowmi Utiramerur,<sup>2</sup>  
5 Yanli Hou,<sup>1</sup> Christine C. Lambert,<sup>3</sup> Kevin S. Eng,<sup>3</sup> Luke Hickey,<sup>3</sup> Jonas Korlach,<sup>3</sup> James Ford,<sup>4,6,7</sup> Euan A.  
6 Ashley\*<sup>2,4,5,6</sup>

7  
8  
9 <sup>1</sup>Department of Pathology, Stanford University, Stanford, California, 94305, USA

10 <sup>2</sup>Clinical Genomics Service, Stanford Health Care, Stanford, California, 94305, USA

11 <sup>3</sup>Pacific Biosciences, Menlo Park, California, 94025, USA

12 <sup>4</sup>Department of Medicine, Stanford University, Stanford, California, 94305, USA

13 <sup>5</sup>Stanford Center for Inherited Cardiovascular Disease, Stanford University, Stanford, California, 94305, USA

14 <sup>6</sup>Department of Genetics, Stanford University, Stanford, California, 94305, USA

15 <sup>7</sup>Stanford Cancer Institute, Stanford, California, 94305, USA

16 <sup>8</sup>These authors contributed equally to this work

17 \*Correspondence: [euan@stanford.edu](mailto:euan@stanford.edu)

18  
19  
20 Abstract word count: 244

21 Main text word count: 1633

22

23 **Abstract**

24 Current clinical genomics assays primarily utilize short-read sequencing (SRS), which offers high throughput, high  
25 base accuracy, and low cost per base. SRS has, however, limited ability to evaluate tandem repeats, regions with  
26 high [GC] or [AT] content, highly polymorphic regions, highly paralogous regions, and large-scale structural  
27 variants. Long-read sequencing (LRS) has complementary strengths and offers a means to discover overlooked  
28 genetic variation in patients undiagnosed by SRS. To evaluate LRS, we selected a patient who presented with  
29 multiple neoplasia and cardiac myxomata suggestive of Carney complex for whom targeted clinical gene testing and  
30 whole genome SRS were negative. Low coverage whole genome LRS was performed on the PacBio Sequel system  
31 and structural variants were called, yielding 6,971 deletions and 6,821 insertions > 50bp. Filtering for variants that  
32 are absent in an unrelated control and that overlap a coding exon of a disease gene identified three deletions and  
33 three insertions. One of these, a heterozygous 2,184 bp deletion, overlaps the first coding exon of *PRKARIA*, which  
34 is implicated in autosomal dominant Carney complex. This variant was confirmed by Sanger sequencing and was  
35 classified as pathogenic using standard criteria for the interpretation of sequence variants. This first successful  
36 application of whole genome LRS to identify a pathogenic variant suggests that LRS has significant potential to  
37 identify disease-causing structural variation. We recommend larger studies to evaluate the diagnostic yield of LRS,  
38 and the development of a comprehensive catalog of common human structural variation to support future studies.

39

40 Short-read sequencing (SRS) methods are currently favored in clinical medicine because of their cost effectiveness  
41 and low per-base error rate. However, these methods are limited in their ability to capture the full range of genomic  
42 variation.<sup>1</sup> Areas of low complexity such as repeats and areas of high polymorphism, such as the HLA region,  
43 present challenges to SRS and reference-based genome assembly. Indeed, with 100 base pair (bp) read length, fully  
44 5% of the genome cannot be uniquely mapped.<sup>2</sup> In addition, many diseases are caused by repeats that become  
45 increasingly pathogenic in a range beyond the resolution of SRS. Another challenge comes in the form of structural  
46 variation, and while SRS has been very successful in the genetic discovery of single nucleotide and small insertion-  
47 deletion variation, recent findings suggest we have greatly underestimated the extent and complexity of structural  
48 variation in the genome.<sup>3,4</sup>

49 Long-read sequencing (LRS), typified by PacBio® single molecule, real-time (SMRT®) sequencing, offers  
50 complementary strengths to SRS. PacBio LRS produces reads of several thousand base pairs with uniform coverage  
51 across sequence contexts.<sup>5</sup> Individual long reads have a lower accuracy (85%) than short reads, but errors are  
52 random and are correctable with sufficient coverage, leading to extremely high consensus accuracy.<sup>5,6</sup> Further, long  
53 reads are more accurately mapped to the genome and access regions that are beyond the reach of short reads.<sup>1</sup> Of  
54 particular note, recent PacBio LRS *de novo* human genome assemblies have revealed tens of thousands of structural  
55 variants per genome, many times more than previously observed with SRS.<sup>3,7</sup> These capabilities, together with  
56 continuing progress in throughput and cost, have begun to make LRS an option for broader application in human  
57 genomics.

58 Here, we report the use of low coverage whole genome PacBio LRS to secure a diagnosis of Carney complex in a  
59 patient unsolved by clinical single gene testing and whole genome SRS. The patient is an Asian/Hispanic male, the  
60 product of an uncomplicated term pregnancy who was hospitalized for the first 10 days of life for cardiac and  
61 respiratory issues (**Figure 1A**). He remained well until the age of 7 years, when, following the discovery of a heart  
62 murmur, he was found to have a left atrial myxoma that was surgically removed. At 10 years, he was noted to have a  
63 testicular mass that, at orchiectomy, was found to be a Sertoli-Leydig cell tumor. At 13 years, a pituitary tumor was  
64 found and initial conservative management was adopted. Aged 16, he was noted to have both an adrenal  
65 microadenoma and recurrence of the cardiac myxomata in the left ventricle and right atrium. Blue naevi were  
66 reported. He underwent a second surgical resection of the myxomata with uncomplicated recovery. Aged 18,

67 recurrent cardiac myxomata including a right ventricular and two left ventricular tumors were once again resected  
68 and a goretex patch was placed in the right ventricular wall. In the immediate post-operative period, he suffered  
69 ventricular tachycardia (VT) and cardiac arrest with spontaneous return of circulation. At this time, a genetics  
70 evaluation suggested the possibility of Carney complex but clinical genetic testing (sequencing of *PRKARIA*) was  
71 negative for disease causing variation. At age 19, multiple thyroid nodules were noted on ultrasound, and he was  
72 also diagnosed with ACTH-independent Cushing's syndrome, secondary to the adrenal microadenoma. At 21, he  
73 underwent trans-sphenoidal resection of the pituitary tumor. At this time, he was found to have recurrent myxomata  
74 in the left ventricular outflow tract that have subsequently increased in size (**Figure 1B-C**). To date, these have been  
75 treated conservatively with anti-coagulation to reduce the risk of stroke. As of 2016, he is under consideration for  
76 heart transplantation and the transplant team judged a molecular diagnosis highly desirable prior to cardiac  
77 transplant listing. As a result, whole genome SRS was performed. Genomic DNA was purified, and a library was  
78 generated using the Illumina® TruSeq® DNA PCR-Free Library Prep Kit, and genome sequencing was performed  
79 using the Illumina HiSeq® 2500 System with paired-end 2 x 100 bp reads to a 36-fold mean depth of coverage. The  
80 data analysis and variant curation were performed by the Stanford Medicine Clinical Genomics Service. Single  
81 nucleotide variants and small insertions and deletions were identified using MedGAP v2.0, a pipeline based on  
82 GATK best practices for data pre-processing and variant discovery with GATK HaplotypeCaller v3.1.1.<sup>8</sup> This  
83 analysis pipeline did not identify any variants that would explain the clinical findings in the patient.

84 To evaluate structural variation, low coverage whole genome LRS was performed on the PacBio Sequel™ system.  
85 Following consent under a protocol approved by the Stanford University Institutional Review Board, DNA was  
86 isolated from a peripheral blood specimen using the Gentra® Puregene® Blood Kit (Qiagen, Germantown, MD).  
87 The DNA was sheared to 20 kb fragments on a Megaruptor® and size-selected to 10 kb using the Sage Science  
88 BluePippin™ system. A SMRTbell™ library was prepared and sequenced on 10 Sequel SMRT Cells 1M with  
89 chemistry S/P1-C1.2 and 6 hour collections. The sequencing yielded 26.7 Gb (8.6-fold coverage of human genome)  
90 in 4.3 million reads with a read length N50 of 9,614 bp. Reads were mapped to the GRCh37/hg19 assembly of the  
91 human genome using NGM-LR v0.1.4 with default parameters.<sup>9</sup> Structural variants were called using PBHoney  
92 Spots with '-q 10 -m 10 -i 20 -e 1 -E 1 -spanMax 100000 -consensus None' for deletions and '-q 10 -m 70 -i 20 -  
93 e 2 -E 2 -spanMax 10000 -consensus None' for insertions.<sup>10</sup> Variant calls were further refined to retain only those  
94 larger than 50 bp, supported by at least 20% of local reads, and at least 100 bp from an assembly gap.

95 The resulting call set consisted of 6,971 deletions and 6,821 insertions. To prioritize candidate pathogenic variants,  
96 the call set was filtered to exclude variants within a segmental duplication or present in the unrelated control  
97 individual NA12878 (A.W., unpublished data). This left 2,368 deletions and 3,174 insertions. Focusing on variants  
98 that overlap a RefSeq coding exon resulted in 20 deletions and 16 insertions, with 3 deletions and 3 insertions in  
99 genes tied to a genetic disease in OMIM (**Table 1**). Manual review of the 6 candidate variants and correlation with  
100 phenotype identified a heterozygous deletion that removes the first coding exon of *PRKARIA* (NM\_212472.2).  
101 Germline variants in *PRKARIA* cause Carney complex, type 1 (MIM #160980), an autosomal dominant multiple  
102 neoplasia syndrome.<sup>11</sup> Two of four reads at the locus unambiguously support the presence of a deletion variant  
103 (**Figure 2A**). Because of the random errors in LRS, individual reads from the same allele can have slight  
104 disagreements, and two reads can be insufficient to define exact deletion breakpoints with full confidence. Here, the  
105 higher quality read supports a 2,184 bp deletion of GRCh37/hg19 chr17:66,510,475-66,512,658  
106 (NC\_000017.10:g.66510475\_66512658del). This heterozygous deletion variant was validated by Sanger  
107 sequencing, which in this case confirmed the precise breakpoints identified by LRS (**Figure 2B**).

108 It is difficult to call structural variants in SRS data with simultaneously high sensitivity and specificity that is  
109 necessary for clinical laboratory testing. Nevertheless, once a small candidate gene list or approximate breakpoints  
110 are known, many variants can be identified retrospectively.<sup>5</sup> In such cases, SRS often provides exact breakpoints to  
111 refine the variant discovered by LRS.<sup>12</sup> Manual inspection of SRS data from the *PRKARIA* locus shows support for  
112 the heterozygous deletion through a drop in read depth and alignment clipping at the deletion breakpoints (**Figure**  
113 **2C**). Multiple short-read structural variant callers, including Pindel, Lumpy, BreakDancer, Manta, CNVKit, and  
114 CNVnator, were retrospectively used to identify structural variants.<sup>13-18</sup> All tools were run with default parameters.  
115 Pindel, Lumpy, BreakDancer, and Manta all identify a deletion in the locus. Pindel and Manta approximately match  
116 the breakpoints identified from LRS and Sanger sequencing.

117 This case demonstrates the ability of whole genome LRS to detect causal structural variation in a rare disease, and to  
118 our knowledge, this is the first reported application of whole genome LRS to identify a pathogenic variant in a  
119 patient. Although manual inspection of the aligned read data and short-read structural variant callers are able to  
120 identify this 2,184 bp deletion, these approaches are not practical to apply genome wide due to limited throughput  
121 and high false-positive call rates, respectively. Looking forward, clinical-grade genomics demands strong precision

122 and recall across the full spectrum of genetic variation. SRS has limited sensitivity for variants larger than a few  
123 base pairs, and it can miss up to 80% of the structural variants in an individual genome.<sup>3</sup> LRS appears to be capable  
124 of identifying much of the missed variation, and manifests high recall of structural variants even at low depths of  
125 coverage.<sup>12</sup>

126 To accelerate the adoption of sequencing-based structural variant analysis into clinical practice, it will be important  
127 for the community to develop and expand an ecosystem of tools and databases similar to that which has arisen  
128 around smaller variants. We advocate further development and continued evaluation of tools and best practices for  
129 calling structural variants from SRS, LRS and orthogonal data. Additionally, we recommend that the community  
130 prioritize creation of a catalog of structural variation derived from these data sources. Databases of common single  
131 nucleotide variation, such as ExAC, have proven incredibly valuable.<sup>19</sup> We expect that a comparable database of  
132 structural variants would be similarly valuable and that building the database from LRS would greatly expand  
133 current catalogs such as DGV and dbVar.<sup>20,21</sup>

134 LRS has seen limited adoption in clinical genomics laboratories, in large part due to the per base error rate and cost.  
135 Although the individual read error rate requires higher coverage to provide clinical-grade identification of single  
136 nucleotide variants, high coverage is not necessarily required for sensitive and specific detection of larger structural  
137 variants. Cost effectiveness will ultimately be judged not on cost per base, but on cost per diagnosis. Larger studies  
138 on the diagnostic yield of various approaches using LRS will be required to answer the question of the most cost  
139 effective technologies for clinical genomics moving forward.

#### 140 **Conflict of interest statement**

141 AW, CL, KE, LH, and JK are employees and shareholders of Pacific Biosciences, a company commercializing DNA  
142 sequencing technologies.

143

144 **Acknowledgements**

145 The authors thank the research subject and clinical care teams for their participation in this research study; Chen-  
146 Shan (Jason) Chin for helpful discussions; and Primo Baybayan and Matt Boitano for PacBio library preparation and  
147 sequencing.

148 **Web Resources**

149 OMIM, <http://www.omim.org/>

150 **References**

- 151 1. Ashley, E.A. (2016). Towards precision medicine. *Nat. Rev. Genet.* *17*, 507–522.
- 152 2. Goldfeder, R.L., Priest, J.R., Zook, J.M., Grove, M.E., Waggott, D., Wheeler, M.T., Salit, M., and  
153 Ashley, E.A. (2016). Medical implications of technical accuracy in genome sequencing. *Genome Med.* *8*,  
154 1–12.
- 155 3. Chaisson, M.J.P., Huddleston, J., Dennis, M.Y., Sudmant, P.H., Malig, M., Hormozdiari, F.,  
156 Antonacci, F., Surti, U., Sandstrom, R., Boitano, M., et al. (2015). Resolving the complexity of the human  
157 genome using single-molecule sequencing. *Nature* *517*, 608–611.
- 158 4. Huddleston, J., Chaisson, M.J., Meltz Steinberg, K., Warren, W., Hoekzema, K., Gordon, D.S., Graves-  
159 Lindsay, T.A., Munson, K.M., Kronenberg, Z.N., Vives, L., et al. (2016). Discovery and genotyping of  
160 structural variation from long-read haploid genome sequence data. *Genome Res.* Advance online  
161 publication. doi:10.1101/gr.214007.116
- 162 5. Chaisson, M.J.P., Wilson, R.K., and Eichler, E.E. (2015). Genetic variation and the de novo assembly  
163 of human genomes. *Nat. Rev. Genet.* *16*, 627–640.
- 164 6. Chin, C.-S., Alexander, D.H., Marks, P., Klammer, A.A., Drake, J., Heiner, C., Clum, A., Copeland,  
165 A., Huddleston, J., Eichler, E.E., et al. (2013). Nonhybrid, finished microbial genome assemblies from

- 166 long-read SMRT sequencing data. *Nat. Methods* *10*, 563–569.
- 167 7. Seo, J.-S., Rhie, A., Kim, J., Lee, S., Sohn, M.-H., Kim, C.-U., Hastie, A., Cao, H., Yun, J.-Y., Kim, J.,  
168 et al. (2016). De novo assembly and phasing of a Korean human genome. *Nature* *538*, 243–247.
- 169 8. Van der Auwera, G.A., Carneiro, M.O., Hartl, C., Poplin, R., Del Angel, G., Levy-Moonshine, A.,  
170 Jordan, T., Shakir, K., Roazen, D., Thibault, J., et al. (2013). From FastQ data to high confidence variant  
171 calls: the Genome Analysis Toolkit best practices pipeline. *Curr. Protoc. Bioinformatics* *43*, 11.10.1–33.
- 172 9. Rescheneder, P., Sedlazeck, F.J., von Haeseler, A., and Schatz, M.C. (2016). NextGenMap-LR  
173 computer program, <https://github.com/philres/nextgenmap-lr> (Cold Spring Harbor Laboratory).
- 174 10. English, A.C., Salerno, W.J., and Reid, J.G. (2014). PBHoney: identifying genomic variants via long-  
175 read discordance and interrupted mapping. *BMC Bioinformatics* *15*, 180.
- 176 11. Kirschner, L.S., Carney, J.A., Pack, S.D., Taymans, S.E., Giatzakis, C., Cho, Y.S., Cho-Chung, Y.S.,  
177 and Stratakis, C.A. (2000). Mutations of the gene encoding the protein kinase A type I-alpha regulatory  
178 subunit in patients with the Carney complex. *Nat. Genet.* *26*, 89–92.
- 179 12. English, A.C., Salerno, W.J., Hampton, O.A., Gonzaga-Jauregui, C., Ambreth, S., Ritter, D.I., Beck,  
180 C.R., Davis, C.F., Dahdouli, M., Ma, S., et al. (2015). Assessing structural variation in a personal  
181 genome-towards a human reference diploid genome. *BMC Genomics* *16*, 286.
- 182 13. Ye, K., Schulz, M.H., Long, Q., Apweiler, R., and Ning, Z. (2009). Pindel: a pattern growth approach  
183 to detect break points of large deletions and medium sized insertions from paired-end short reads.  
184 *Bioinformatics* *25*, 2865–2871.
- 185 14. Layer, R.M., Chiang, C., Quinlan, A.R., and Hall, I.M. (2014). LUMPY: a probabilistic framework  
186 for structural variant discovery. *Genome Biol.* *15*, R84.
- 187 15. Chen, K., Wallis, J.W., McLellan, M.D., Larson, D.E., Kalicki, J.M., Pohl, C.S., McGrath, S.D.,



- 188 Wendl, M.C., Zhang, Q., Locke, D.P., et al. (2009). BreakDancer: an algorithm for high-resolution  
189 mapping of genomic structural variation. *Nat. Methods* 6, 677–681.
- 190 16. Chen, X., Schulz-Trieglaff, O., Shaw, R., Barnes, B., Schlesinger, F., Källberg, M., Cox, A.J.,  
191 Kruglyak, S., and Saunders, C.T. (2016). Manta: rapid detection of structural variants and indels for  
192 germline and cancer sequencing applications. *Bioinformatics* 32, 1220–1222.
- 193 17. Talevich, E., Shain, A.H., Botton, T., and Bastian, B.C. (2016). CNVkit: Genome-Wide Copy  
194 Number Detection and Visualization from Targeted DNA Sequencing. *PLoS Comput. Biol.* 12,  
195 e1004873.
- 196 18. Abyzov, A., Urban, A.E., Snyder, M., and Gerstein, M. (2011). CNVnator: an approach to discover,  
197 genotype, and characterize typical and atypical CNVs from family and population genome sequencing.  
198 *Genome Res.* 21, 974–984.
- 199 19. Lek, M., Karczewski, K.J., Minikel, E.V., Samocha, K.E., Banks, E., Fennell, T., O’Donnell-Luria,  
200 A.H., Ware, J.S., Hill, A.J., Cummings, B.B., et al. (2016). Analysis of protein-coding genetic variation in  
201 60,706 humans. *Nature* 536, 285–291.
- 202 20. MacDonald, J.R., Ziman, R., Yuen, R.K.C., Feuk, L., and Scherer, S.W. (2014). The Database of  
203 Genomic Variants: a curated collection of structural variation in the human genome. *Nucleic Acids Res.*  
204 42, D986–D992.
- 205 21. Lappalainen, I., Lopez, J., Skipper, L., Hefferon, T., Spalding, J.D., Garner, J., Chen, C., Maguire, M.,  
206 Corbett, M., Zhou, G., et al. (2013). DbVar and DGVa: public archives for genomic structural variation.  
207 *Nucleic Acids Res.* 41, D936–D941.
- 208
- 209

210 **Figure Titles and Legends**

211 **Figure 1. Clinical history and three-dimensional transthoracic echocardiography of patient with multiple**  
212 **neoplasia including cardiac myxomata.** (A) Patient narrative. VT= ventricular tachycardia (B) A 2 x 3 cm  
213 myxoma is seen in the left ventricular outflow tract (white arrow). (C) The 2 x 3 cm myxoma is seen from another  
214 perspective (lower left, white arrow). A 5 x 4 cm myxoma is seen in the right atrium (lower right, white arrow).

215

216 **Figure 2. Heterozygous deletion in *PRKARIA*.** (A) PacBio long reads identify a heterozygous 2,184 bp deletion  
217 that includes the first coding exon of *PRKARIA*. Two of four reads at the locus support the deletion. (B) Sanger  
218 sequencing confirms the deletion. The forward (YH\_479426-1073) and reverse (YH\_479426-1074) sequences from  
219 a representative amplicon agree to the base pair with the higher quality PacBio read, PacBio\_53019216. (C)  
220 Illumina short reads support the heterozygous deletion variant through a drop in read coverage and clipped reads at  
221 the deletion breakpoints.

222

|                                | Deletions > 50 bp | Insertions > 50 bp |
|--------------------------------|-------------------|--------------------|
| Initial call set               | 6,971             | 6,821              |
| Not in segmental duplication   | 5,818             | 6,254              |
| Not in NA12878 control         | 2,368             | 3,174              |
| Overlaps RefSeq coding exon    | 20                | 16                 |
| Gene linked to disease in OMIM | 3                 | 3                  |

223

224 **Table 1. Prioritizing candidate pathogenic variants.** The initial call set of 6,971 deletions and 6,821 insertions  
225 was filtered to remove variants in segmental duplications or the NA12878 control and to focus on variants that  
226 overlap coding exons of genes with a known link to genetic disease.

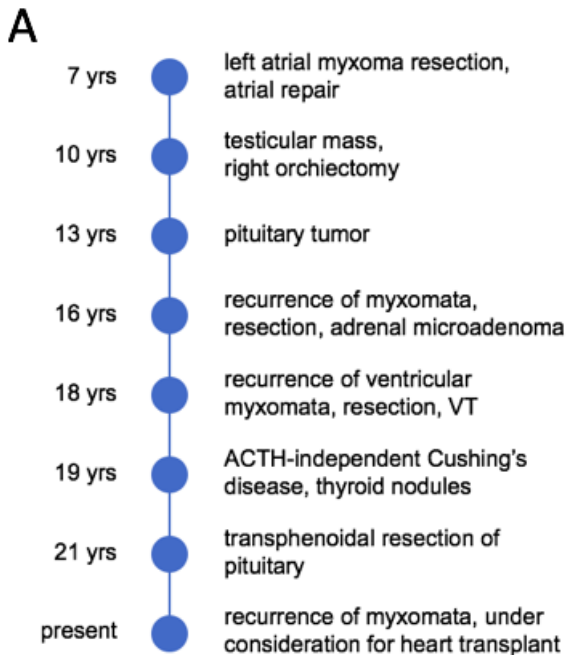

**B**

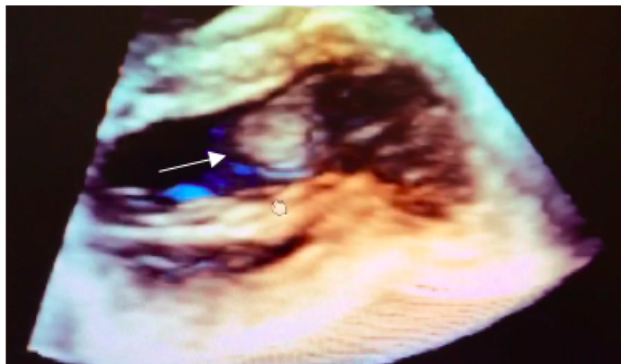

**C**

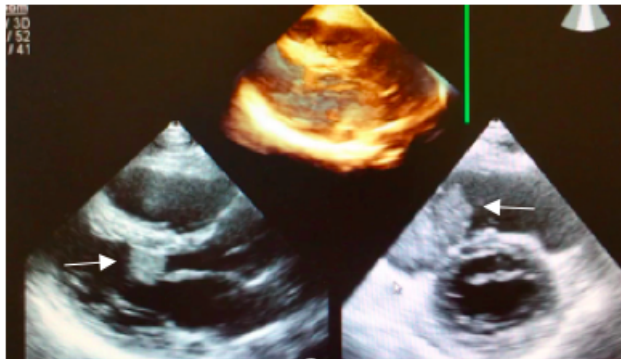

**A**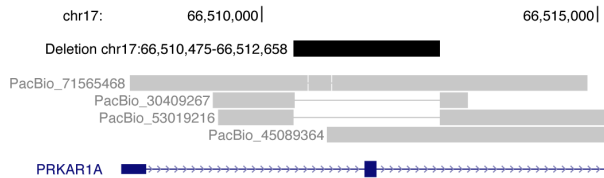**B**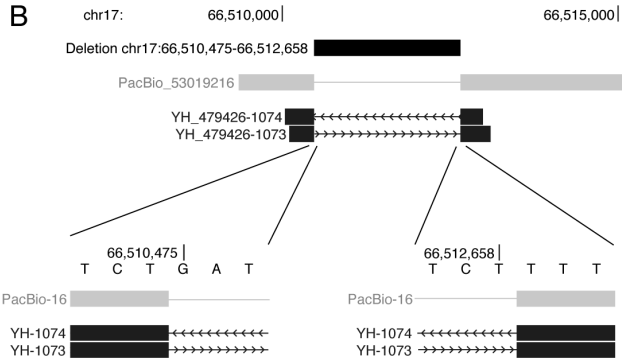**C**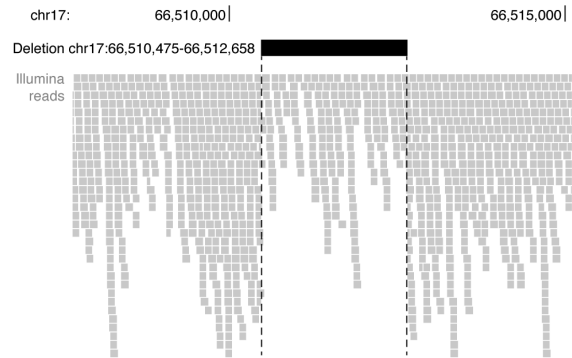

Source: https://www.biorxiv.org/content/10.1101/090985v1.full.pdf
